# Supplementary material
Source: publisher figshare collection journal article supplement (https://karger.figshare.com/ndownloader/files/21995295)
Supplement: Supplementary file 1 [file 21995295]

## Sheet: Supplement Tab 1 V2
Supplement Table 1: Laboratory values and treatment characteristics.
Pat #	Lowest TG [mg/dl] before commencement of DFPP	Mean TG [mg/dl] before DFPP	SD	Mean TG [mg/dl] after DFPP	SD	Mean Reduction Rate [%]	SD	Treatment frequency w=weekly; w2-3=twice- three times per week; 2w=biweekly	Treated plasma volume [l]	Anti-coagulation
1	1296	2219	1212	1360	957	44.5	13	w2-3	3.5	UFH
2	1145	4941	3956	1818	1648	65	16	w2-3	5.8	UFH + ACDA
3	1486	5412	3127	5028	2352	17	12	w	4	UFH
4	2708	2897	1548	1500	1071	51	15	w	4	UFH
5	1276	2173	662	939	414	29	17	w	3.6	UFH
6	3059	1628	793	333	470	83	13	2w	4	UFH
7	1200	3783	534	2997	809	13	21	w2/w	2	UFH
8	1398	2720	1938	1275	1495	66	21	w2/w	4.5	UFH + ACDA
9	1416	1191	458	751	298	37	16	w	3.8	UFH
10	1152	1686	1492	953	847	40	19	w2/w	5	UFH
w: weekly; w2-3: twice-three times per week; 2w: biweekly; ACDA: anticoagulant citrate dextrose; UFH: unfractionated heparin
